# Supplementary material for: Genus Salsola: Chemistry, Biological Activities and Future Prospective—A Review
Source: MDPI journal article supplement (doi:10.3390/plants11060714), 2022-03-08
Supplement: s1 [file s1]

**Table S1: List of flavonoids isolated from different *Salsola* species**

| No | Compound Name                           | Source                                                                                                                                                                                                                                      | Molecular Formula                               | Molecular weight g/mol | References          |
|----|-----------------------------------------|---------------------------------------------------------------------------------------------------------------------------------------------------------------------------------------------------------------------------------------------|-------------------------------------------------|------------------------|---------------------|
| 1  | Quercetin                               | <i>S. kali</i><br><i>S. imbricata</i><br><i>S. baryosma</i> ( <i>S. foetida</i> )<br><i>S. volkensis</i> ,<br><i>S. collina</i> ,<br><i>S. grandis</i><br><i>S. longifolia</i><br><i>S. tetrandra</i><br><i>S. vermiculata</i>              | C <sub>15</sub> H <sub>10</sub> O <sub>7</sub>  | 302.2                  | [1–11]              |
| 2  | Quercetin-3-O-methyl ether              | <i>S. grandis</i>                                                                                                                                                                                                                           | C <sub>16</sub> H <sub>12</sub> O <sub>7</sub>  | 316.3                  | [3,4]               |
| 3  | Quercetin-3-O-glucoside (Isoquercitrin) | <i>S. kali</i><br><i>S. volkensis</i><br><i>S. tetragona</i><br><i>S. collina</i><br><i>S. soda</i><br><i>S. komarovii</i>                                                                                                                  | C <sub>21</sub> H <sub>20</sub> O <sub>12</sub> | 464.4                  | [8,12–15]           |
| 4  | Quercetin-3-O-glactoside (Hyperoside)   | <i>S. grandis</i>                                                                                                                                                                                                                           | C <sub>21</sub> H <sub>20</sub> O <sub>12</sub> | 464.4                  | [3,4]               |
| 5  | Quercetin-3-O-rhamnoside (Quercitrin)   | <i>S. kali</i><br><i>S. longifolia</i><br><i>S. grandis</i><br><i>S. imbricata</i>                                                                                                                                                          | C <sub>21</sub> H <sub>20</sub> O <sub>11</sub> | 448.4                  | [3,4,6–8]           |
| 6  | Quercetin-3-O-rutinoside (rutin)        | <i>S. kali</i><br><i>S. tetragona</i><br><i>S. tetrandra</i><br><i>S. volkensis</i><br><i>S. inermis</i><br><i>S. collina</i><br><i>S. imbricata</i><br><i>S. grandis</i><br><i>S. komarovii</i><br><i>S. vermiculata</i><br><i>S. soda</i> | C <sub>27</sub> H <sub>30</sub> O <sub>16</sub> | 610.5                  | [1,3–6,8,10,14,15]  |
| 7  | Rhamnetin                               | <i>S. kali</i>                                                                                                                                                                                                                              | C <sub>16</sub> H <sub>12</sub> O <sub>7</sub>  | 316.3                  | [8,9]               |
| 8  | Isorhmnetin                             | <i>S. collina</i><br><i>S. imbricata</i><br><i>S. komarovii</i>                                                                                                                                                                             | C <sub>16</sub> H <sub>12</sub> O <sub>7</sub>  | 316.3                  | [1,10,13,15,16]     |
| 9  | Isorhmnetin-3-O-glucoside               | <i>S. kali</i><br><i>S. grandis</i><br><i>S. oppositifolia</i><br><i>S. komarovii</i><br><i>S. collina</i><br><i>S. imbricata</i><br><i>S. tetrandra</i><br><i>S. inermis</i><br><i>S. vermiculate</i>                                      | C <sub>22</sub> H <sub>22</sub> O <sub>12</sub> | 478.4                  | [3–5,9,10,13,15–19] |

| No | Compound Name                                                   | Source                                                                                                                                                                       | Molecular Formula                               | Molecular weight g/mol | References       |
|----|-----------------------------------------------------------------|------------------------------------------------------------------------------------------------------------------------------------------------------------------------------|-------------------------------------------------|------------------------|------------------|
| 10 | Isorhmnetin-3-O-glucouronide                                    | <i>S. grandis</i><br><i>S. soda</i>                                                                                                                                          | C <sub>22</sub> H <sub>20</sub> O <sub>13</sub> | 492.4                  | [3,4,14]         |
| 11 | Isorhmnetin-3-O-galactopyranoside                               | <i>S. imbricata</i>                                                                                                                                                          | C <sub>22</sub> H <sub>22</sub> O <sub>12</sub> | 478                    | [16]             |
| 12 | Isorhmnetin-7-O-glucoside                                       | <i>S. collina</i>                                                                                                                                                            | C <sub>22</sub> H <sub>22</sub> O <sub>12</sub> | 478.4                  | [19]             |
| 13 | Isorhmnetin-3-O-rutinoside (Narcissin)                          | <i>S. kali</i><br><i>S. grandis</i><br><i>S. oppositifolia</i><br><i>S. collina</i><br><i>S. vermiculata</i><br><i>S. komarovii</i><br><i>S. tetrandra</i><br><i>S. soda</i> | C <sub>28</sub> H <sub>32</sub> O <sub>16</sub> | 624.5                  | [3–5,9,13–15,18] |
| 14 | Isorhmnetin-3-O-B-D-glucuronyl(1"→4") B-D-glucuronic acid       | <i>S. imbricata</i>                                                                                                                                                          | -                                               | -                      | [16]             |
| 15 | Isorhmnetin-3-O-B-D-diglucuronate dimethyl ester                | <i>S. imbricata</i>                                                                                                                                                          | -                                               | -                      | [16]             |
| 16 | Isorhamnetin-3-O-α-L-arabinopyranosyl(1→6)- β-D-glucopyranoside | <i>S. collina</i>                                                                                                                                                            | C <sub>26</sub> H <sub>29</sub> O <sub>16</sub> | 597                    | [19]             |
| 17 | Manghaslin                                                      | <i>S. grandis</i>                                                                                                                                                            | C <sub>33</sub> H <sub>40</sub> O <sub>20</sub> | 756.7                  | [3,4]            |
| 18 | Kaempferol                                                      | <i>S. kail</i><br><i>S. longifolia</i><br><i>S. tetrandra</i><br><i>S. inermis</i><br><i>S. collina</i><br><i>S. baryosma</i><br><i>S. vermiculata</i>                       | C <sub>15</sub> H <sub>10</sub> O <sub>6</sub>  | 286.2                  | [2,8,10,14]      |
| 19 | Kaempferol-3-methyl ether                                       | <i>S. inermis</i>                                                                                                                                                            | C <sub>16</sub> H <sub>12</sub> O <sub>6</sub>  | 300.3                  | [17]             |
| 20 | Kaempferol-3-O- glucoside (astragalin)                          | <i>S. komarovii</i><br><i>S. tetragona</i><br><i>S. inermis</i>                                                                                                              | C <sub>21</sub> H <sub>20</sub> O <sub>11</sub> | 448.4                  | [12,15,17]       |
| 21 | Kaempferol-3-O- rutinoside                                      | <i>S. komarovii</i>                                                                                                                                                          | C <sub>27</sub> H <sub>30</sub> O <sub>15</sub> | 594.5                  | [15]             |
| 22 | Tiliroside                                                      | <i>S. grandis</i>                                                                                                                                                            | C <sub>30</sub> H <sub>26</sub> O <sub>13</sub> | 594.5                  | [3,4]            |
| 23 | Salcolin A                                                      | <i>S. collina</i>                                                                                                                                                            | C <sub>27</sub> H <sub>26</sub> O <sub>11</sub> | 526.5                  | [20]             |
| 24 | Salcolin B                                                      | <i>S. collina</i>                                                                                                                                                            | C <sub>27</sub> H <sub>26</sub> O <sub>11</sub> | 526.5                  | [20]             |
| 25 | Apigenin                                                        | <i>S. imbricata</i>                                                                                                                                                          | C <sub>15</sub> H <sub>10</sub> O <sub>5</sub>  | 270.2                  | [6]              |
| 26 | Tricin                                                          | <i>S. collina</i>                                                                                                                                                            | C <sub>17</sub> H <sub>14</sub> O <sub>7</sub>  | 330.3                  | [1,13,19]        |
| 27 | Selagin                                                         | <i>S. collina</i>                                                                                                                                                            | C <sub>16</sub> H <sub>12</sub> O <sub>7</sub>  | 316.3                  | [19]             |
| 28 | Tricin-7-O-glucoside                                            | <i>S. collina</i>                                                                                                                                                            | C <sub>23</sub> H <sub>24</sub> O <sub>12</sub> | 492.4                  | [1,13,19]        |
| 29 | Tricin-4'-O- β-D-apioside                                       | <i>S. collina</i>                                                                                                                                                            | C <sub>43</sub> H <sub>42</sub> O <sub>21</sub> | 894                    | [19]             |
| 30 | Chrysoeriol-7-O-B-D-glucopyranoside                             | <i>S. baryosma</i>                                                                                                                                                           | C <sub>22</sub> H <sub>22</sub> O <sub>11</sub> | 462.4                  | [21]             |
| 31 | Chrysin                                                         | <i>S. imbricata</i>                                                                                                                                                          | C <sub>15</sub> H <sub>10</sub> O <sub>4</sub>  | 254.2                  | [6]              |
| 32 | 5,3'-Dihydroxy-7,8,2'-                                          | <i>S. somalensis</i>                                                                                                                                                         | C <sub>18</sub> H <sub>16</sub> O <sub>7</sub>  | 344                    | [22]             |

| No | Compound Name                                                                                                                | Source                                                                            | Molecular Formula                               | Molecular weight g/mol | References |
|----|------------------------------------------------------------------------------------------------------------------------------|-----------------------------------------------------------------------------------|-------------------------------------------------|------------------------|------------|
|    | trimethoxy isoflavone                                                                                                        |                                                                                   |                                                 |                        |            |
| 33 | 5,3'-Dihydroxy-2'-methoxy-6,7-methylenedioxyisoflavone                                                                       | <i>S. somalensis</i>                                                              | C <sub>17</sub> H <sub>12</sub> O <sub>7</sub>  | 328                    | [22]       |
| 34 | 5,3'-Dihydroxy-6,7,8,2'-tetramethoxyisoflavone                                                                               | <i>S. somalensis</i>                                                              | C <sub>19</sub> H <sub>18</sub> O <sub>8</sub>  | 374                    | [22]       |
| 35 | 5,3'-Dihydroxy-6,7,2'-trimethoxyisoflavone                                                                                   | <i>S. somalensis</i>                                                              | C <sub>18</sub> H <sub>16</sub> O <sub>7</sub>  | 344                    | [23]       |
| 36 | 5,8,3'-Trihydroxy-7,2'-dimethoxyisoflavone                                                                                   | <i>S. somalensis</i>                                                              | C <sub>17</sub> H <sub>14</sub> O <sub>7</sub>  | 330                    | [23]       |
| 37 | 8,3'-Dihydroxy-5,7,2'-trimethoxyisoflavone                                                                                   | <i>S. somalensis</i>                                                              | C <sub>18</sub> H <sub>16</sub> O <sub>7</sub>  | 344                    | [23]       |
| 38 | 5,6,3'-Trihydroxy-7,2'dimethoxyisoflavone                                                                                    | <i>S. somalensis</i>                                                              | C <sub>17</sub> H <sub>14</sub> O <sub>7</sub>  | 330                    | [23]       |
| 39 | 6,7,3'-Trihydroxy5,2'-dimethoxyisoflavone                                                                                    | <i>S. somalensis</i>                                                              | C <sub>17</sub> H <sub>14</sub> O <sub>7</sub>  | 330                    | [23]       |
| 40 | 5,6,3'-Trihydroxy-2'-methoxy-7,8-methylenedioxy isoflavone<br>OR<br>5,8,3'-Trihydroxy-2'-methoxy-6,7-methylendioxyisoflavone | <i>S. somalensis</i>                                                              | C <sub>17</sub> H <sub>12</sub> O <sub>8</sub>  | 344                    | [23]       |
| 41 | 3'-Hydroxy-5,6,7,2'-tetramethoxyisoflavone                                                                                   | <i>S. somalensis</i>                                                              | C <sub>19</sub> H <sub>18</sub> O <sub>7</sub>  | 358                    | [23]       |
| 42 | 7,3'-Dihydroxy-5,6,2'-trimethoxyisoflavone                                                                                   | <i>S. somalensis</i>                                                              | C <sub>18</sub> H <sub>16</sub> O <sub>7</sub>  | 344                    | [23]       |
| 43 | 6,3'-Dihydroxy-5,7,2'-trimethoxyisoflavone                                                                                   | <i>S. somalensis</i>                                                              | C <sub>18</sub> H <sub>16</sub> O <sub>7</sub>  | 344                    | [23]       |
| 44 | 5,7,8,2',3'-Pentamethoxyisoflavone                                                                                           | <i>S. somalensis</i>                                                              | C <sub>20</sub> H <sub>20</sub> O <sub>7</sub>  | 372                    | [22]       |
| 45 | 5,2',3'-Trimethoxy-6,7-methylendioxyisoflavone                                                                               | <i>S. somalensis</i>                                                              | -                                               | -                      | [22]       |
| 46 | Salisoflavan                                                                                                                 | <i>S. imbricata</i>                                                               | C <sub>17</sub> H <sub>18</sub> O <sub>6</sub>  | 318.1                  | [24]       |
| 47 | 5,2'-Dihydroxy-6,7-methylenedioxyisoflavone                                                                                  | <i>S. collina</i>                                                                 | C <sub>16</sub> H <sub>10</sub> O <sub>6</sub>  | 298                    | [1]        |
| 48 | Tetranin B                                                                                                                   | <i>S. tetrandra</i>                                                               | C <sub>17</sub> H <sub>12</sub> O <sub>7</sub>  | 329.1                  | [25]       |
| 49 | Naringenin                                                                                                                   | <i>S. imbricata</i>                                                               | C <sub>15</sub> H <sub>12</sub> O <sub>5</sub>  | 272.3                  | [6]        |
| 50 | Hesperetin                                                                                                                   | <i>S. imbricata</i>                                                               | C <sub>16</sub> H <sub>14</sub> O <sub>6</sub>  | 302.3                  | [6]        |
| 51 | Hesperidin                                                                                                                   | <i>S. imbricata</i>                                                               | C <sub>28</sub> H <sub>34</sub> O <sub>15</sub> | 610.6                  | [6]        |
| 52 | Catechin                                                                                                                     | <i>S. imbricata</i>                                                               | C <sub>15</sub> H <sub>14</sub> O <sub>6</sub>  | 290.3                  | [6]        |
| 53 | (-) Epicatechin                                                                                                              | In the most of the <i>Salsola</i> species except <i>kali</i> and <i>tetragona</i> | C <sub>15</sub> H <sub>14</sub> O <sub>6</sub>  | 290.3                  | [8]        |

**Table S2: List of phenolic compounds isolated from different *Salsola* species**

| No | Compound Name                                      | Source                                                            | Molecular Formula                               | Molecular weight g/mol | References |
|----|----------------------------------------------------|-------------------------------------------------------------------|-------------------------------------------------|------------------------|------------|
| 54 | Hydroxy tyrosol-4'-glucopyranoside (Biphenol 2)    | <i>S. komarovii</i>                                               | C <sub>14</sub> H <sub>24</sub> O <sub>9</sub>  | 336                    | [26]       |
| 55 | 2-(3,4-dihydroxy)-Phenyl-ethyl-B-D-glucopyranoside | <i>S. komarovii</i>                                               | -                                               | -                      | [26]       |
| 56 | Cuneataside C                                      | <i>S. komarovii</i>                                               | C <sub>19</sub> H <sub>28</sub> O <sub>12</sub> | 448.4                  | [26]       |
| 57 | Benzyl-6-O-B-D-apiofuranosyl-B-D-glucopyranoside   | <i>S. komarovii</i>                                               | -                                               | -                      | [26]       |
| 58 | Catechol                                           | <i>S. imbricata</i>                                               | C <sub>6</sub> H <sub>6</sub> O <sub>2</sub>    | 110.1                  | [6]        |
| 59 | Tetranin A                                         | <i>S. tetrandra</i>                                               | C <sub>15</sub> H <sub>16</sub> O <sub>4</sub>  | 260                    | [25]       |
| 60 | Biphenylsalsinol                                   | <i>S. villosa</i>                                                 | C <sub>20</sub> H <sub>22</sub> O <sub>6</sub>  | 381                    | [27]       |
| 61 | Biphenylsalsonoid B                                | <i>S. imbricata</i>                                               | C <sub>21</sub> H <sub>24</sub> O <sub>8</sub>  | 404                    | [28]       |
| 62 | Biphenylsalsonoid A                                | <i>S. imbricata</i>                                               | C <sub>20</sub> H <sub>22</sub> O <sub>7</sub>  | 374                    | [28]       |
| 63 | Acanthoside D                                      | <i>S. collina</i>                                                 | C <sub>34</sub> H <sub>46</sub> O <sub>18</sub> | 742.7                  | [19]       |
| 64 | Salsolide                                          | <i>S. baryosma</i>                                                | C <sub>32</sub> H <sub>32</sub> O <sub>11</sub> | 591.2                  | [29]       |
| 65 | Phloroglucin                                       | <i>S. tetrandra</i><br><i>S. tetragona</i><br><i>S. volkensii</i> | C <sub>6</sub> H <sub>6</sub> O <sub>3</sub>    | 126                    | [8]        |
| 66 | 3,4,5-Trimethoxyphenyl-B-D-glucopyranoside         | <i>S. tetrandra</i>                                               | C <sub>15</sub> H <sub>22</sub> O <sub>9</sub>  | 346                    | [30]       |
| 67 | Canthoside C                                       | <i>S. tetragona</i><br><i>S. komarovii</i>                        | C <sub>18</sub> H <sub>26</sub> O <sub>12</sub> | 434.4                  | [12,26]    |
| 68 | Canthoside D                                       | <i>S. tetragona</i>                                               | C <sub>18</sub> H <sub>26</sub> O <sub>12</sub> | 434.1                  | [12]       |
| 69 | Tachioside                                         | <i>S. komarovii</i>                                               | C <sub>13</sub> H <sub>18</sub> O <sub>8</sub>  | 302.3                  | [26]       |
| 70 | Isotachioside                                      | <i>S. komarovii</i>                                               | C <sub>13</sub> H <sub>18</sub> O <sub>8</sub>  | 302.3                  | [26]       |

**Table S3: List of phenolic acids isolated from different *Salsola* species**

| No | Compound Name                  | Source                                                                                                                             | Molecular Formula                              | Molecular weight g/mol | References     |
|----|--------------------------------|------------------------------------------------------------------------------------------------------------------------------------|------------------------------------------------|------------------------|----------------|
| 71 | <i>p</i> -Hydroxybenzoic acid  | <i>S. kali</i><br><i>S. collina</i><br><i>S. imbricata</i>                                                                         | C <sub>7</sub> H <sub>6</sub> O <sub>3</sub>   | 138.1                  | [1,16,31,32]   |
| 72 | Salicylic acid                 | <i>S. collina</i><br><i>S. imbricate</i><br><i>S. vermiculata</i>                                                                  | C <sub>7</sub> H <sub>6</sub> O <sub>3</sub>   | 138.1                  | [1,6,19,32]    |
| 73 | Anisic acid                    | <i>S. collina</i>                                                                                                                  | C <sub>8</sub> H <sub>8</sub> O <sub>3</sub>   | 152.1                  | [1]            |
| 74 | Benzoic acid                   | <i>S. imbricata</i>                                                                                                                | C <sub>7</sub> H <sub>6</sub> O <sub>2</sub>   | 122.1                  | [6]            |
| 75 | Protocatechuic acid            | <i>S. kali</i><br><i>S. longifolia</i><br><i>S. tetragona</i><br><i>S. collina</i><br><i>S. imbricate</i><br><i>S. vermiculata</i> | C <sub>7</sub> H <sub>6</sub> O <sub>4</sub>   | 154.1                  | [6,8,31,32]    |
| 76 | Gallic acid                    | <i>S. kali</i><br><i>S. imbricate</i><br><i>S. vermiculata</i>                                                                     | C <sub>7</sub> H <sub>6</sub> O <sub>5</sub>   | 170.1                  | [6,8]          |
| 77 | Syringic acid                  | <i>S. kali</i><br><i>S. collina</i>                                                                                                | C <sub>9</sub> H <sub>10</sub> O <sub>5</sub>  | 198.2                  | [31,32]        |
| 78 | Vanillic acid                  | <i>S. kali</i><br><i>S. tetragona</i><br><i>S. collina</i><br><i>S. imbricate</i><br><i>S. vermiculata</i>                         | C <sub>8</sub> H <sub>8</sub> O <sub>4</sub>   | 168.1                  | [6,12,31,32]   |
| 79 | Protocatechuic aldehyde        | <i>S. collina</i>                                                                                                                  | C <sub>7</sub> H <sub>6</sub> O <sub>3</sub>   | 138.1                  | [1]            |
| 80 | α- resorcylic                  | <i>S. kali</i>                                                                                                                     | C <sub>7</sub> H <sub>6</sub> O <sub>4</sub>   | 154.1                  | [31]           |
| 81 | β-resorcylic                   | <i>S. kali</i>                                                                                                                     | C <sub>7</sub> H <sub>6</sub> O <sub>4</sub>   | 154.1                  | [31]           |
| 82 | Gentisic acid                  | <i>S. kali</i><br><i>S. longifolia</i>                                                                                             | C <sub>7</sub> H <sub>6</sub> O <sub>4</sub>   | 154.1                  | [8,31]         |
| 83 | Isovanillic acid               | <i>S. imbricata</i>                                                                                                                | C <sub>8</sub> H <sub>8</sub> O <sub>4</sub>   | 168.1                  | [16]           |
| 84 | Hypogallic acid                | <i>S. kali</i><br><i>S. tetrandra</i><br><i>S. volkensii</i><br><i>S. inermis</i>                                                  | C <sub>7</sub> H <sub>6</sub> O <sub>4</sub>   | 154.1                  | [8]            |
| 85 | Orsellic acid                  | <i>S. collina</i>                                                                                                                  | C <sub>8</sub> H <sub>8</sub> O <sub>4</sub>   | 168.1                  | [32]           |
| 86 | <i>p</i> -Hydroxyphenylacetic  | <i>S. kali</i>                                                                                                                     | C <sub>8</sub> H <sub>8</sub> O <sub>3</sub>   | 152.1                  | [31]           |
| 87 | Rosmarinic acid                | <i>S. imbricate</i><br><i>S. vermiculata</i>                                                                                       | C <sub>18</sub> H <sub>16</sub> O <sub>8</sub> | 360.3                  | [6,7]          |
| 88 | <i>p</i> -Hydroxycinnamic acid | <i>S. collina</i><br><i>S. kali</i><br><i>S. imbricata</i>                                                                         | C <sub>9</sub> H <sub>8</sub> O <sub>3</sub>   | 164.2                  | [1,6,19,31–33] |
| 89 | Caffeic acid                   | <i>S. kali</i><br><i>S. collina</i><br><i>S. imbricate</i><br><i>S. vermiculata</i>                                                | C <sub>9</sub> H <sub>8</sub> O <sub>4</sub>   | 180.2                  | [6,11,31,32]   |

| No | Compound Name       | Source                                                                              | Molecular Formula                               | Molecular weight g/mol | References         |
|----|---------------------|-------------------------------------------------------------------------------------|-------------------------------------------------|------------------------|--------------------|
| 90 | Ferulic acid        | <i>S. kali</i><br><i>S. collina</i><br><i>S. imbricate</i><br><i>S. vermiculata</i> | C <sub>10</sub> H <sub>10</sub> O <sub>4</sub>  | 194.2                  | [6,11,16,19,31,32] |
| 91 | Cinnamic acid       | <i>S. imbricate</i><br><i>S. vermiculata</i>                                        | C <sub>9</sub> H <sub>8</sub> O <sub>2</sub>    | 148.2                  | [6]                |
| 92 | Acetyl ferulic acid | <i>S. collina</i>                                                                   | C <sub>12</sub> H <sub>12</sub> O <sub>5</sub>  | 236.2                  | [1]                |
| 93 | Chlorogenic acid    | <i>S. imbricata</i><br><i>S. kali</i>                                               | C <sub>16</sub> H <sub>18</sub> O <sub>9</sub>  | 354.3                  | [6,11]             |
| 94 | Neochlorogenic acid | <i>S. kali</i>                                                                      | C <sub>16</sub> H <sub>18</sub> O <sub>9</sub>  | 354.3                  | [11]               |
| 95 | Isochlorogenic acid | <i>S. kali</i>                                                                      | C <sub>25</sub> H <sub>24</sub> O <sub>12</sub> | 516.4                  | [11]               |

**Table S4: List of nitrogenous compounds isolated from different *Salsola* species**

| No  | Compound Name                                                                                 | Source                                                                                                            | Molecular Formula                               | Molecular weight g/mol | References   |
|-----|-----------------------------------------------------------------------------------------------|-------------------------------------------------------------------------------------------------------------------|-------------------------------------------------|------------------------|--------------|
| 96  | Moupinamide                                                                                   | <i>S. collina</i>                                                                                                 | C <sub>18</sub> H <sub>19</sub> NO <sub>4</sub> | 313.3                  | [1]          |
| 97  | 2'-Hydroxymoupinamide                                                                         | <i>S. collina</i>                                                                                                 | C <sub>18</sub> H <sub>21</sub> NO <sub>5</sub> | 331                    | [1]          |
| 98  | 2'-Hydroxy- 3''-methylmoupinamide                                                             | <i>S. collina</i>                                                                                                 | C <sub>19</sub> H <sub>23</sub> NO <sub>6</sub> | 361                    | [1]          |
| 99  | N-[2'-(3'',4''-Dihydroxyphenyl)-2'-hydroxyethyl]-3-(4'''-methoxyphenyl)prop-2-enamide         | <i>S. foetida</i>                                                                                                 | C <sub>18</sub> H <sub>19</sub> NO <sub>5</sub> | 329                    | [34]         |
| 100 | N-[2'-(3'',4''-Dihydroxyphenyl)-2'-hydroxyethyl]-3-(3'''',4'''-dimethoxyphenyl)prop-2-enamide | <i>S. foetida</i>                                                                                                 | C <sub>19</sub> H <sub>21</sub> NO <sub>6</sub> | 359                    | [34]         |
| 101 | N-[2'-(3''-Hydroxy-4''-methoxyphenyl)-2'-hydroxyethyl]3-(4'''-methoxyphenyl)-prop-2-enamide   | <i>S. foetida</i>                                                                                                 | C <sub>19</sub> H <sub>21</sub> NO <sub>5</sub> | 343                    | [34]         |
| 102 | N-trans-feruloyl 3-O-methyldopamine                                                           | <i>S. collina</i><br><i>S. komarovii</i>                                                                          | C <sub>19</sub> H <sub>21</sub> NO <sub>5</sub> | 343                    | [15,33,35]   |
| 103 | N-trans-feruloyl tyramine                                                                     | <i>S. komarovii</i><br><i>S. tetrandra</i><br><i>S. imbricata</i><br><i>S. vermiculata</i><br><i>S. tetrandra</i> | C <sub>18</sub> H <sub>19</sub> NO <sub>4</sub> | 313.3                  | [5,15,16,30] |
| 104 | trans-N-feruloyltyramine-4'''-O-B-D-glucopyranoside                                           | <i>S. inermis</i>                                                                                                 | C <sub>24</sub> H <sub>30</sub> NO <sub>9</sub> | 476.3                  | [17]         |
| 105 | S-(-)-trans-N-feruloyloctopamine                                                              | <i>S. tetrandra</i>                                                                                               | C <sub>18</sub> H <sub>19</sub> NO <sub>5</sub> | 329.3                  | [30]         |
| 106 | N-Caffeoyltyramine                                                                            | <i>S. vermiculata</i><br><i>S. tetrandra</i>                                                                      | C <sub>17</sub> H <sub>17</sub> NO <sub>4</sub> | 299.3                  | [5]          |
| 107 | N-Feruloyl- 3'''-methoxytyramine                                                              | <i>S. vermiculata</i><br><i>S. tetrandra</i>                                                                      | C <sub>19</sub> H <sub>21</sub> NO <sub>5</sub> | 343.3                  | [5]          |

| No  | Compound Name                                        | Source                                                                                                                         | Molecular Formula                                             | Molecular weight g/mol | References  |
|-----|------------------------------------------------------|--------------------------------------------------------------------------------------------------------------------------------|---------------------------------------------------------------|------------------------|-------------|
| 108 | <i>N</i> -(3',4'-Dimethoxy-cinnamoyl)-norepinephrine | <i>S. vermiculata</i><br><i>S. tetrandra</i>                                                                                   | C <sub>19</sub> H <sub>21</sub> NO <sub>6</sub>               | 359.3                  | [5]         |
| 109 | <i>N</i> -(4'-Methoxy-cinnamoyl)-norepinephrine      | <i>S. vermiculata</i><br><i>S. tetrandra</i>                                                                                   | C <sub>18</sub> H <sub>19</sub> NO <sub>5</sub>               | 329.3                  | [5]         |
| 110 | Salsoline                                            | <i>S. collina</i><br><i>S. kali</i> ( <i>S. tragus</i> )<br><i>S. soda</i><br><i>S. oppositifolia</i><br><i>S. vermiculata</i> | C <sub>11</sub> H <sub>15</sub> NO <sub>2</sub>               | 193.2                  | [18,36–38]  |
| 111 | <i>N</i> -Methylisosalsolidine                       | <i>S. tragus</i><br><i>S. soda</i><br><i>S. oppositifolia</i>                                                                  | C <sub>12</sub> H <sub>17</sub> NO <sub>2</sub>               | 207.3                  | [38]        |
| 112 | Salsolidine                                          | <i>S. collina</i><br><i>S. kali</i> ( <i>S. tragus</i> )<br><i>S. soda</i><br><i>S. oppositifolia</i><br><i>S. vermiculata</i> | C <sub>12</sub> H <sub>17</sub> NO <sub>2</sub>               | 207.3                  | [18,36–38]  |
| 113 | Carnegine                                            | <i>S. soda</i><br><i>S. kali</i><br><i>S. oppositifolia</i>                                                                    | C <sub>13</sub> H <sub>19</sub> NO <sub>2</sub>               | 221.3                  | [37,38]     |
| 114 | Salsoline A                                          | <i>S. tetrandra</i><br><i>S. vermiculata</i><br><i>S. collina</i>                                                              | C <sub>12</sub> H <sub>13</sub> NO <sub>3</sub>               | 219                    | [1,5,33,35] |
| 115 | Salsoline B                                          | <i>S. collina</i>                                                                                                              | C <sub>12</sub> H <sub>13</sub> NO <sub>3</sub>               | 219                    | [33]        |
| 116 | <i>N</i> -(4-methylpentanoyl) tyramine               | <i>S. vermiculata</i>                                                                                                          | C <sub>14</sub> H <sub>21</sub> NO <sub>2</sub>               | 235                    | [5]         |
| 117 | Uracil                                               | <i>S. collina</i>                                                                                                              | C <sub>4</sub> H <sub>4</sub> N <sub>2</sub> O <sub>2</sub>   | 112.1                  | [1]         |
| 118 | Uridine                                              | <i>S. collina</i>                                                                                                              | C <sub>9</sub> H <sub>12</sub> N <sub>2</sub> O <sub>6</sub>  | 244.2                  | [1]         |
| 119 | Terrestric acid                                      | <i>S. collina</i>                                                                                                              | C <sub>4</sub> H <sub>5</sub> N <sub>4</sub> O <sub>3</sub>   | 157                    | [1]         |
| 120 | Pericampylinone-A                                    | <i>S. collina</i>                                                                                                              | C <sub>9</sub> H <sub>9</sub> NO <sub>3</sub>                 | 179.2                  | [1]         |
| 121 | <i>N</i> -Acetyltryptophan                           | <i>S. collina</i><br><i>S. grandis</i>                                                                                         | C <sub>13</sub> H <sub>14</sub> N <sub>2</sub> O <sub>3</sub> | 246.3                  | [1,3,4]     |
| 122 | Betaine                                              | <i>S. rigida</i><br><i>S. longifolia</i><br><i>S. kali</i><br><i>S. tetrandra</i>                                              | C <sub>5</sub> H <sub>11</sub> NO <sub>2</sub>                | 117.2                  | [39]        |
| 123 | Methyl carbamate                                     | <i>S. rigida</i><br><i>S. longifolia</i><br><i>S. kali</i><br><i>S. tetrandra</i>                                              | C <sub>2</sub> H <sub>5</sub> NO <sub>2</sub>                 | 75.1                   | [40]        |
| 124 | Salisomide                                           | <i>S. imbricata</i>                                                                                                            | C <sub>38</sub> H <sub>69</sub> NO <sub>2</sub>               | 571.5                  | [24]        |
| 125 | Triacetoneamine                                      | <i>S. kali</i><br><i>S. tetrandra</i><br><i>S. rigida</i><br><i>S. longifolia</i>                                              | C <sub>9</sub> H <sub>17</sub> NO                             | 155.2                  | [39]        |
| 126 | Tridecanamine                                        | <i>S. tetrandra</i>                                                                                                            | C <sub>13</sub> H <sub>29</sub> N                             | 199.4                  | [41]        |

**Table S5: List of saponin compounds isolated from different *Salsola* species**

| No  | Compound Name                                                                                          | Source                              | Molecular Formula                               | Molecular weight g/mol | References |
|-----|--------------------------------------------------------------------------------------------------------|-------------------------------------|-------------------------------------------------|------------------------|------------|
| 127 | Momordin II b                                                                                          | <i>S. grandis</i>                   | C <sub>42</sub> H <sub>66</sub> O <sub>14</sub> | 794                    | [3,4,42]   |
| 128 | Momordin II c                                                                                          | <i>S. grandis</i><br><i>S. soda</i> | C <sub>47</sub> H <sub>74</sub> O <sub>18</sub> | 926                    | [3,4]      |
| 129 | Pseudoginseoside RT1                                                                                   | <i>S. imbricata</i>                 | C <sub>47</sub> H <sub>74</sub> O <sub>18</sub> | 926                    | [42]       |
| 130 | Salsoloside C                                                                                          | <i>S. micranthera</i>               | C <sub>47</sub> H <sub>74</sub> O <sub>18</sub> | 926                    | [43,44]    |
| 131 | Salsoloside D                                                                                          | <i>S. micranthera</i>               | C <sub>47</sub> H <sub>74</sub> O <sub>19</sub> | 942                    | [43,44]    |
| 132 | Salsoloside E                                                                                          | <i>S. micranthera</i>               | C <sub>53</sub> H <sub>84</sub> O <sub>23</sub> | 1088                   | [43,44]    |
| 133 | Olean-12-en-28-oic acid (Oleanolic acid)                                                               | <i>S. inermis</i>                   | C <sub>30</sub> H <sub>48</sub> O <sub>3</sub>  | 456                    | [17]       |
| 134 | Olean-12-en-3,28-diol                                                                                  | <i>S. inermis</i>                   | C <sub>30</sub> H <sub>50</sub> O <sub>2</sub>  | 442                    | [17]       |
| 135 | Boussingoside A2                                                                                       | <i>S. imbricata</i>                 | C <sub>41</sub> H <sub>62</sub> O <sub>14</sub> | 778                    | [42]       |
| 136 | 3-O-B-D-xylopyranosyl-(1-2)-O-B-D-glucuronopyranosyl-akebonic acid-28-O-B-D-glucopyranoside            | <i>S. imbricata</i>                 | C <sub>46</sub> H <sub>70</sub> O <sub>18</sub> | 910                    | [42]       |
| 137 | 3-O-B-D-xylopyranosyl-(1-2)-O-B-D-glucuronopyranosyl-29-hydroxyoleanolic acid-28-O-B-D-glucopyranoside | <i>S. imbricata</i>                 | C <sub>47</sub> H <sub>74</sub> O <sub>19</sub> | 942                    | [42]       |

**Table S6: List of triterpenes isolated from different *Salsola* species**

| No  | Compound Name                                                  | Source             | Molecular Formula                               | Molecular weight g/mol | References |
|-----|----------------------------------------------------------------|--------------------|-------------------------------------------------|------------------------|------------|
| 138 | Corchoionoside C                                               | <i>S. collina</i>  | C <sub>19</sub> H <sub>30</sub> O <sub>8</sub>  | 386.4                  | [1]        |
| 139 | Lupeol                                                         | <i>S. kali</i>     | C <sub>30</sub> H <sub>50</sub> O               | 426.7                  | [45]       |
| 140 | Salsolic acid                                                  | <i>S. baryosma</i> | C <sub>30</sub> H <sub>48</sub> O <sub>5</sub>  | 488.7                  | [46]       |
| 141 | Ursolic acid                                                   | <i>S. kali</i>     | C <sub>30</sub> H <sub>48</sub> O <sub>3</sub>  | 456.7                  | [45]       |
| 142 | Salsolin A                                                     | <i>S. baryosma</i> | C <sub>30</sub> H <sub>48</sub> O <sub>6</sub>  | 504                    | [46]       |
| 143 | Salsolin B                                                     | <i>S. baryosma</i> | C <sub>36</sub> H <sub>59</sub> O <sub>12</sub> | 683                    | [46]       |
| 144 | 2 $\alpha$ ,3 $\beta$ ,23,24-tetrahydroxyurs-12-en-28-oic acid | <i>S. baryosma</i> | C <sub>30</sub> H <sub>48</sub> O <sub>6</sub>  | 504                    | [46]       |



**Table S7: List of sterols isolated from different *Salsola* species**

| No  | Compound Name                                 | Source                                                                                                                      | Molecular Formula                              | Molecular weight g/mol | References       |
|-----|-----------------------------------------------|-----------------------------------------------------------------------------------------------------------------------------|------------------------------------------------|------------------------|------------------|
| 145 | Sitostanol = Stigmastanol                     | <i>S. collina</i><br><i>S. kali</i><br><i>S. tetrandra</i><br><i>S. rigida</i><br><i>S. longifolia</i><br><i>S. inermis</i> | C <sub>29</sub> H <sub>52</sub> O              | 416.7                  | [10,13]          |
| 146 | Stigmasterol                                  | <i>S. kali</i><br><i>S. tetrandra</i><br><i>S. rigida</i><br><i>S. longifolia</i><br><i>S. inermis</i><br><i>S. collina</i> | C <sub>29</sub> H <sub>48</sub> O              | 412                    | [10,13,17,47,48] |
| 147 | Stigmasterol- 3- $\beta$ -O-D-glucopyranoside | <i>S. inermis</i>                                                                                                           | C <sub>35</sub> H <sub>58</sub> O <sub>6</sub> | 574.8                  | [17]             |
| 148 | Avenasterol                                   | <i>S. kali</i><br><i>S. tetrandra</i><br><i>S. rigida</i><br><i>S. longifolia</i>                                           | C <sub>29</sub> H <sub>48</sub> O              | 412.7                  | [47,48]          |
| 149 | B- Sitosterol                                 | <i>S. kali</i><br><i>S. inermis</i><br><i>S. collina</i><br><i>S. oppositifolia</i>                                         | C <sub>29</sub> H <sub>50</sub> O              | 414.7                  | [10,17,18,45]    |
| 150 | B- Sitosterol-3-O-glucoside                   | <i>S. kali</i>                                                                                                              | C <sub>35</sub> H <sub>60</sub> O <sub>6</sub> | 576.8                  | [49]             |
| 151 | Campesterol                                   | <i>S. collina</i>                                                                                                           | C <sub>28</sub> H <sub>48</sub> O              | 400.7                  | [10,13]          |

**Table S8: List of fatty acids isolated from different *Salsola* species**

| No  | Compound Name                                               | Source                                                                                       | Molecular Formula                              | Molecular weight g/mol | References   |
|-----|-------------------------------------------------------------|----------------------------------------------------------------------------------------------|------------------------------------------------|------------------------|--------------|
| 152 | 2- Monolinolenin                                            | <i>S. oppositifolia</i>                                                                      | C <sub>21</sub> H <sub>36</sub> O <sub>4</sub> | 352.5                  | [18]         |
| 153 | 2,3 Dihydroxy propyl palmitate                              | <i>S. tetragona</i>                                                                          | C <sub>19</sub> H <sub>38</sub> O <sub>4</sub> | 330.5                  | [12]         |
| 154 | 8- Hexadecynoic acid (stearolic acid)                       | <i>S. tetrandra</i>                                                                          | C <sub>18</sub> H <sub>32</sub> O <sub>2</sub> | 280.4                  | [41]         |
| 155 | 9,12,13 Trihydroxy octadeca 7-enoic acid                    | <i>S. vermiculata</i><br><i>S. tetrandra</i>                                                 | C <sub>18</sub> H <sub>34</sub> O <sub>5</sub> | 330.5                  | [5]          |
| 156 | 9,12,13 Trihydroxy decosan 10,15,19-trienoic acid           | <i>S. inermis</i>                                                                            | C <sub>22</sub> H <sub>42</sub> O <sub>5</sub> | 386                    | [17]         |
| 157 | 9,12,13 Trihydroxy octadeca-10(E),15(Z)-dienoic acid        | <i>S. tetrandra</i>                                                                          | C <sub>18</sub> H <sub>32</sub> O <sub>5</sub> | 328.4                  | [30]         |
| 158 | 9,12,13 Trihydroxy octadeca-10(E)-dienoic acid              | <i>S. tetrandra</i>                                                                          | C <sub>18</sub> H <sub>34</sub> O <sub>5</sub> | 330.2                  | [30]         |
| 159 | 9,12 Octadecadienoic (Z,Z), methyl ester (methyl linoleate) | <i>S. tetrandra</i><br><i>S. oppositifolia</i>                                               | C <sub>19</sub> H <sub>34</sub> O <sub>2</sub> | 294.5                  | [18,41]      |
| 160 | 11- Eicosenoic                                              | <i>S. tetrandra</i>                                                                          | C <sub>20</sub> H <sub>38</sub> O <sub>2</sub> | 310.5                  | [41]         |
| 161 | Arachidic acid                                              | <i>S. tetrandra</i><br><i>S. vermiculata</i>                                                 | C <sub>20</sub> H <sub>40</sub> O <sub>2</sub> | 312.5                  | [41]         |
| 162 | Arachidonic acid                                            | <i>S. kali</i>                                                                               | C <sub>20</sub> H <sub>32</sub> O <sub>2</sub> | 304.5                  | [47]         |
| 163 | Behenic acid (docosanoic)                                   | <i>S. tetrandra</i>                                                                          | C <sub>22</sub> H <sub>44</sub> O <sub>2</sub> | 340.6                  | [41]         |
| 164 | Hexacosanoic acid                                           | <i>S. tetrandra</i>                                                                          | C <sub>26</sub> H <sub>52</sub> O <sub>2</sub> | 396.7                  | [41]         |
| 165 | Hydoxy octadecatrienoic acid                                | <i>S. vermiculata</i><br><i>S. tetrandra</i>                                                 | C <sub>18</sub> H <sub>30</sub> O <sub>3</sub> | 294.4                  | [5]          |
| 166 | Hydoxy octadecadienoic acid                                 | <i>S. vermiculata</i><br><i>S. tetrandra</i>                                                 | C <sub>18</sub> H <sub>32</sub> O <sub>3</sub> | 296.4                  | [5]          |
| 167 | Lauric acid                                                 | <i>S. tetrandra</i>                                                                          | C <sub>12</sub> H <sub>24</sub> O <sub>2</sub> | 200.3                  | [41]         |
| 168 | Lignoceric acid (tetracosanoic)                             | <i>S. tetrandra</i><br><i>S. vermiculate</i>                                                 | C <sub>24</sub> H <sub>48</sub> O <sub>2</sub> | 368.6                  | [41]         |
| 169 | Nonadecanoic acid                                           | <i>S. tetrandra</i>                                                                          | C <sub>19</sub> H <sub>38</sub> O <sub>2</sub> | 298                    | [41]         |
| 170 | Linoleic acid                                               | <i>S. tetrandra</i><br><i>S. collina</i><br><i>S. vermiculate</i><br><i>S. oppositifolia</i> | C <sub>18</sub> H <sub>32</sub> O <sub>2</sub> | 280.5                  | [5,10,18,41] |
| 171 | Methyl linolenate                                           | <i>S. oppositifolia</i>                                                                      | C <sub>19</sub> H <sub>32</sub> O <sub>2</sub> | 292.5                  | [18]         |
| 172 | Linolenic acid                                              | <i>S. tetrandra</i><br><i>S. collina</i><br><i>S. vermiculate</i><br><i>S. kali</i>          | C <sub>18</sub> H <sub>30</sub> O <sub>2</sub> | 278.4                  | [5,10,41,47] |
| 173 | Methyl palmitate                                            | <i>S. oppositifolia</i><br><i>S. tetrandra</i>                                               | C <sub>17</sub> H <sub>34</sub> O <sub>2</sub> | 270.5                  | [18,41]      |
| 174 | Heptadecanoic (margaric) acid                               | <i>S. tetrandra</i>                                                                          | C <sub>17</sub> H <sub>34</sub> O <sub>2</sub> | 270.5                  | [41]         |
| 175 | Myristic acid                                               | <i>S. tetrandra</i>                                                                          | C <sub>14</sub> H <sub>28</sub> O <sub>2</sub> | 228.4                  | [41]         |
| 176 | Methyl stearate                                             | <i>S. oppositifolia</i>                                                                      | C <sub>19</sub> H <sub>38</sub> O <sub>2</sub> | 298.5                  | [18]         |

| No  | Compound Name                                                  | Source                                                                                                         | Molecular Formula                              | Molecular weight g/mol | References      |
|-----|----------------------------------------------------------------|----------------------------------------------------------------------------------------------------------------|------------------------------------------------|------------------------|-----------------|
| 177 | Octacosanoic acid                                              | <i>S. tetrandra</i>                                                                                            | C <sub>28</sub> H <sub>56</sub> O <sub>2</sub> | 424.7                  | [41]            |
| 178 | Oleic acid                                                     | <i>S. kali</i><br><i>S. tetrandra</i><br><i>S. tetragona</i><br><i>S. collina</i><br><i>S. vermiculate</i>     | C <sub>18</sub> H <sub>34</sub> O <sub>2</sub> | 282.5                  | [5,10,12,41,47] |
| 179 | Octadecanoic acid, 2,3-dihydroxypropyl ester (monostearin)     | <i>S. tetrandra</i>                                                                                            | C <sub>21</sub> H <sub>42</sub> O <sub>4</sub> | 358.6                  | [41]            |
| 180 | Palmitic acid                                                  | <i>S. tetrandra</i><br><i>S. collina</i><br><i>S. vermiculate</i><br><i>S. oppositifolia</i><br><i>S. kali</i> | C <sub>16</sub> H <sub>32</sub> O <sub>2</sub> | 256.4                  | [5,10,18,41,47] |
| 181 | Palmitoleic acid                                               | <i>S. tetrandra</i>                                                                                            | C <sub>16</sub> H <sub>30</sub> O <sub>2</sub> | 254.4                  | [41]            |
| 182 | Stearic acid                                                   | <i>S. tetrandra</i><br><i>S. kali</i><br><i>S. vermiculate</i>                                                 | C <sub>18</sub> H <sub>36</sub> O <sub>2</sub> | 284.5                  | [41,47]         |
| 183 | Trihydroxy octadecadienoic acid                                | <i>S. tetrandra</i><br><i>S. vermiculate</i>                                                                   | C <sub>18</sub> H <sub>32</sub> O <sub>5</sub> | 328.4                  | [5]             |
| 184 | Tetradecanoic acid, methyl ester (myristic acid, methyl ester) | <i>S. tetrandra</i>                                                                                            | C <sub>15</sub> H <sub>30</sub> O <sub>2</sub> | 242.4                  | [41]            |
| 185 | Tricosanoic acid                                               | <i>S. tetrandra</i>                                                                                            | C <sub>23</sub> H <sub>46</sub> O <sub>2</sub> | 354.6                  | [41]            |
| 186 | <i>cis</i> -10- Heptadecanoic acid                             | <i>S. tetrandra</i>                                                                                            | C <sub>17</sub> H <sub>32</sub> O <sub>2</sub> | 268                    | [41]            |

**Table S9: List of volatile constituents isolated from different *Salsola* species**

| No  | Compound Name                | Source                | Molecular Formula                                 | Molecular weight g/mol | References |
|-----|------------------------------|-----------------------|---------------------------------------------------|------------------------|------------|
| 187 | Carvone                      | <i>S. vermiculata</i> | C <sub>10</sub> H <sub>14</sub> O                 | 150.2                  | [50],      |
| 188 | Linalool                     | <i>S. vermiculata</i> | C <sub>10</sub> H <sub>18</sub> O                 | 154.3                  | [50]       |
| 189 | 9- Hydroxylinaloyl glucoside | <i>S. tetrandra</i>   | C <sub>16</sub> H <sub>28</sub> O <sub>7</sub> Na | 355.2                  | [30]       |
| 190 | Limonene                     | <i>S. vermiculata</i> | C <sub>10</sub> H <sub>16</sub>                   | 136.2                  | [50]       |
| 191 | <i>B</i> -Caryophyllene      | <i>S. vermiculata</i> | C <sub>15</sub> H <sub>24</sub>                   | 204.4                  | [50]       |
| 192 | Vanillin                     | <i>S. collina</i>     | C <sub>8</sub> H <sub>8</sub> O <sub>3</sub>      | 152.2                  | [1]        |
| 193 | Cumin aldehyde               | <i>S. vermiculata</i> | C <sub>10</sub> H <sub>12</sub> O                 | 148.2                  | [50]       |
| 194 | Benzyl salicylate            | <i>S. cyclophylla</i> | C <sub>14</sub> H <sub>12</sub> O <sub>3</sub>    | 228                    | [51]       |
| 195 | Hexa hydrofarnesyl acetone   | <i>S. cyclophylla</i> | C <sub>18</sub> H <sub>36</sub> O                 | 268                    | [51]       |

**Table S10: List of lignanas isolated from different *Salsola* species**

| No  | Compound Name                                        | Source              | Molecular Formula                               | Molecular weight g/mol | References |
|-----|------------------------------------------------------|---------------------|-------------------------------------------------|------------------------|------------|
| 196 | (+)-Lyoniresinol 9'-O-β-D - glucopyranoside          | <i>S. komarovii</i> | C <sub>28</sub> H <sub>38</sub> O <sub>13</sub> | 582.6                  | [26]       |
| 197 | (8S,8'R,7'R)-9'-[(B-glucopyranosyl)oxy] lyoniresinol | <i>S. komarovii</i> | -                                               | -                      | [26]       |
| 198 | Lariciresinol-9'-O-β-D-glucopyranoside               | <i>S. komarovii</i> | C <sub>38</sub> H <sub>46</sub> O <sub>17</sub> | 774.8                  | [26]       |
| 199 | Alangilignoside C                                    | <i>S. komarovii</i> | C <sub>28</sub> H <sub>38</sub> O <sub>13</sub> | 582                    | [26]       |
| 200 | Conicaoside                                          | <i>S. komarovii</i> | C <sub>27</sub> H <sub>36</sub> O <sub>12</sub> | 552                    | [26]       |

**Table S11: List of magastigmane isolated from different *Salsola* species**

| No  | Compound Name                                                 | Source              | Molecular Formula                              | Molecular weight g/mol | References |
|-----|---------------------------------------------------------------|---------------------|------------------------------------------------|------------------------|------------|
| 201 | Icariside B <sub>2</sub>                                      | <i>S. komarovii</i> | C <sub>19</sub> H <sub>30</sub> O <sub>8</sub> | 386.4                  | [26]       |
| 202 | Staphylionoside D                                             | <i>S. komarovii</i> | C <sub>19</sub> H <sub>30</sub> O <sub>8</sub> | 386.4                  | [26]       |
| 203 | Blumenyl A β-D-glucopyranoside                                | <i>S. komarovii</i> | -                                              | -                      | [26]       |
| 204 | (6R,9S)-3-oxo-α-ionol β-D-glucopyranoside                     | <i>S. komarovii</i> | -                                              | -                      | [26]       |
| 205 | 3-oxo-α-ionol 9-O-β-D-apiofuranosyl-(1→6)-β-D-glucopyranoside | <i>S. komarovii</i> | -                                              | -                      | [26]       |
| 206 | Blumenyl B β-D-glucopyranoside                                | <i>S. komarovii</i> | C <sub>19</sub> H <sub>32</sub> O <sub>8</sub> | 388                    | [26]       |
| 207 | Blumenol B 9-O-β-D-apiofuranosyl-(1→6)-β-D-glucopyranoside    | <i>S. komarovii</i> | -                                              | -                      | [26]       |

**Table S12: List of coumarins isolated from different *Salsola* species**

| No  | Compound Name                                        | Source                                  | Molecular Formula                               | Molecular weight g/mol | References |
|-----|------------------------------------------------------|-----------------------------------------|-------------------------------------------------|------------------------|------------|
| 208 | Daphnoretin                                          | <i>S. baryosma</i>                      | C <sub>19</sub> H <sub>12</sub> O <sub>7</sub>  | 352.3                  | [21]       |
| 209 | Daphnorin                                            | <i>S. baryosma</i>                      | C <sub>25</sub> H <sub>22</sub> O <sub>12</sub> | 514.4                  | [21]       |
| 210 | Umbelliferone                                        | <i>S. inermis</i>                       | C <sub>9</sub> H <sub>6</sub> O <sub>3</sub>    | 162.1                  | [17]       |
| 211 | Scopoletin                                           | <i>S. baryosma</i><br><i>S. inermis</i> | C <sub>10</sub> H <sub>8</sub> O <sub>4</sub>   | 192.2                  | [17,21]    |
| 212 | Scopoletin 7-O-B-D-glucopyranside                    | <i>S. laricifolia</i>                   | C <sub>16</sub> H <sub>18</sub> O <sub>9</sub>  | 354.3                  | [52]       |
| 213 | Fraxidin                                             | <i>S. laricifolia</i>                   | C <sub>11</sub> H <sub>10</sub> O <sub>5</sub>  | 222.2                  | [52]       |
| 214 | Isofraxidin                                          | <i>S. laricifolia</i>                   | C <sub>11</sub> H <sub>10</sub> O <sub>5</sub>  | 222.2                  | [52]       |
| 215 | Fraxetin                                             | <i>S. laricifolia</i>                   | C <sub>10</sub> H <sub>8</sub> O <sub>5</sub>   | 208.2                  | [52]       |
| 216 | Isofraxidin 7-O-B-D-glucopyranoside (calycanthoside) | <i>S. laricifolia</i>                   | C <sub>17</sub> H <sub>20</sub> O <sub>10</sub> | 384.3                  | [52]       |
| 217 | Fraxidin-8-O-B-D-glucopyranoside                     | <i>S. laricifolia</i>                   | C <sub>17</sub> H <sub>20</sub> O <sub>10</sub> | 384.3                  | [52]       |
| 218 | Bergaptol                                            | <i>S. baryosma</i>                      | C <sub>11</sub> H <sub>6</sub> O <sub>4</sub>   | 202.2                  | [21]       |
| 219 | Bergaptol-5-O-B-D-glucopyranoside                    | <i>S. baryosma</i>                      | C <sub>17</sub> H <sub>17</sub> O <sub>9</sub>  | 365                    | [21]       |

**Table S13: List of cardiac glycosides isolated from different *Salsola* species**

| No  | Compound Name                                           | Source              | Molecular Formula                               | Molecular weight g/mol | References |
|-----|---------------------------------------------------------|---------------------|-------------------------------------------------|------------------------|------------|
| 220 | 3-O-B-D-Allopyranosyl-coroglaucigenin (salsotetragonin) | <i>S. tetragona</i> | C <sub>29</sub> H <sub>44</sub> O <sub>10</sub> | 553.3                  | [12]       |
| 221 | Uzargenin                                               | <i>S. tetragona</i> | C <sub>23</sub> H <sub>34</sub> O <sub>4</sub>  | 374.5                  | [12]       |
| 222 | Desglucouzarin                                          | <i>S. tetragona</i> | C <sub>29</sub> H <sub>44</sub> O <sub>9</sub>  | 536.7                  | [12]       |
| 223 | 12-Dehydroxyghalaktinoside                              | <i>S. tetragona</i> | C <sub>29</sub> H <sub>42</sub> O <sub>10</sub> | 551.3                  | [12]       |
| 224 | Calactin                                                | <i>S. tetragona</i> | C <sub>29</sub> H <sub>40</sub> O <sub>9</sub>  | 532.6                  | [12]       |

**Table S14: List of alcohols isolated from different *Salsola* species**

| No  | Compound Name            | Source                  | Molecular Formula                              | Molecular weight g/mol | References |
|-----|--------------------------|-------------------------|------------------------------------------------|------------------------|------------|
| 225 | Salsolanol               | <i>S. villosa</i>       | C <sub>12</sub> H <sub>18</sub> O <sub>3</sub> | 210                    | [27]       |
| 226 | Phytol                   | <i>S. oppositifolia</i> | C <sub>20</sub> H <sub>40</sub> O              | 296                    | [18]       |
| 227 | 3,9 Diethyl-6-tridecanol | <i>S. tetrandra</i>     | C <sub>17</sub> H <sub>36</sub> O              | 256                    | [41]       |
| 228 | 2,7-Dimethyl-1-octanol   | <i>S. tetrandra</i>     | C <sub>10</sub> H <sub>22</sub> O              | 158                    | [41]       |

**Table S15: List of cyanogenic, isoprenoid, and Sulphur containing compounds isolated from different *Salsola* species**

| No  | Compound Name                                                                                                                 | Source              | Molecular Formula                                | Molecular weight g/mol | References |
|-----|-------------------------------------------------------------------------------------------------------------------------------|---------------------|--------------------------------------------------|------------------------|------------|
| 229 | Taxiphllin                                                                                                                    | <i>S. tetrandra</i> | C <sub>14</sub> H <sub>17</sub> NO <sub>7</sub>  | 311                    | [30]       |
| 230 | 3- $\beta$ -hydroxy-5 $\alpha$ ,6 $\alpha$ -epoxy- $\beta$ -ionone-2- $\alpha$ -O- $\beta$ -D-glucopyranoside (Norisoprenoid) | <i>S. tetrandra</i> | C <sub>19</sub> H <sub>30</sub> O <sub>9</sub>   | 402                    | [30]       |
| 231 | Isohexyl 2- pentyl ester, sulfurous acid                                                                                      | <i>S. tetrandra</i> | C <sub>11</sub> H <sub>24</sub> O <sub>3</sub> S | 236                    | [41]       |

## References

- Jin, Y.-S.; Du, J.-L.; Yang, Y.; Jin, L.; Song, Y.; Zhang, W.; Chen, H.-S. Chemical and biologically active constituents of *Salsola collina*. *Chem. Nat. Compd.* **2011**, *47*, 257-260.
- Kaur, P.; Bains, N. Extraction of flavonoids from in vitro and in vivo tissue culture of some important halophytes of western Rajasthan. *Int. J. Pharmtech Res.* **2012**, *4*, 1167-1171.
- Orhan, I.E.; Kucukboyaci, N.; Calis, I.; Cerón-Carrasco, J.P.; den-Haan, H.; Peña-García, J.; Pérez-Sánchez, H. Acetylcholinesterase inhibitory assessment of isolated constituents from *Salsola grandis* Freitag, Vural & Adıgüzel and molecular modeling studies on N-acetyltryptophan. *Phytochem. Lett.* **2017**, *20*, 373-378.
- Küçükboyacı, N.; Küpeli Akkol, E.; Suntarihsan Çalış, İ.; Çalış, İ. In vivo Anti-Inflammatory and Antinociceptive Activities of the Extracts and Chemical Constituents of an Endemic Turkish Plant, *Salsola grandis*. *Rec. Nat. Prod.* **2016**, *10*.
- Rasheed, D.M.; El Zalabani, S.M.; Koheil, M.A.; El-Hefnawy, H.M.; Farag, M.A. Metabolite profiling driven analysis of *Salsola* species and their anti-acetylcholinesterase potential. *Natural Product Research* **2013**, *27*, 2320-2327, doi:10.1080/14786419.2013.832676.
- Shehab, N.G.; Abu-Gharbieh, E. Phenolic profiling and evaluation of contraceptive effect of the ethanolic extract of *Salsola imbricata* Forssk. in male albino rats. *Evid. Based Complement. Alternat. Med.* **2014**, *2014*, 1-8.
- Shehab, N.G.; Abu-Gharbieh, E.; Bayoumi, F.A. Impact of phenolic composition on hepatoprotective and antioxidant effects of four desert medicinal plants. *BMC Complement. Altern. Med.* **2015**, *15*, 401.
- Taia, W.K.; Shiha, M.A.; Al-Kogali, A.A.; Abd-Elmaged, A.M. Anatomical and chemotaxonomical investigations within some *Salsola* L. species grown in the western costal region of Egypt. *Int. J. Sci. Res. Manag.* **2018**, *6*.
- Tundis, R.; Loizzo, M.; Statti, G.; Menichini, F. Inhibitory effects on the digestive enzyme  $\alpha$ -amylase of three *Salsola* species (Chenopodiaceae) in vitro. *Pharmazie* **2007**, *62*, 473-475.

10. Zaikov, K.; Syrchina, A.; Vereshchagin, A.; Chernousova, A.; Semenov, A. An investigation of the chemical composition of the seeds of *Salsola collina*. *Chem. Nat. Compd.* **1992**, *28*, 627-628.
11. Lodhi, M. Allelopathic potential of *Salsola kali* L. and its possible role in rapid disappearance of weedy stage during revegetation. *J. Chem. Ecol.* **1979**, *5*, 429-437.
12. Ghorab, H.; Khettaf, A.; Lehbili, M.; Kabouche, A.; Magid, A.A.; Harakat, D.; Voutquenne-Nazabadioko, L.; Kabouche, Z. A new cardenolide and other compounds from *Salsola tetragona*. *Nat. Prod. Commun.* **2017**, *12*, 1934578X1701200102.
13. Syrchina, A.; Vereshchagin, A.; Larin, M.; Semenov, A. Flavonoids of *Salsola collina*. *Chem. Nat. Compd.* **1989**, *25*, 619-620.
14. Iannuzzi, A.M.; Moschini, R.; De Leo, M.; Pineschi, C.; Balestri, F.; Cappiello, M.; Braca, A.; Del-Corso, A. Chemical profile and nutraceutical features of *Salsola soda* (agretti): Anti-inflammatory and antidiabetic potential of its flavonoids. *Food Bioscience* **2020**, *37*, 100713.
15. Lee, H.J.; Pan, C.-H.; Kim, E.-S.; Kim, C.Y. Online high performance liquid chromatography (HPLC)-ABTS+ based assay and HPLC-electrospray ionization mass spectrometry analysis of antioxidant phenolic compounds in *Salsola komarovii*. *J. Korean Soc. Appl. Biol. Chem.* **2012**, *55*, 317-321.
16. Osman, S.M.; El Kashak, W.A.; Wink, M.; El Raey, M.A. New isorhamnetin derivatives from *Salsola imbricata* Forssk. leaves with distinct anti-inflammatory activity. *Pharmacogn. Mag.* **2016**, *12*, S47.
17. Elsharabasy, F.S.; Hosney, A.M. Chemical constituents from the aerial parts of *Salsola inermis*. *Egypt. Pharm. J.* **2013**, *12*, 90.
18. Tundis, R.; Loizzo, M.R.; Bonesi, M.; Menichini, F.; Statti, G.A.; Menichini, F. In vitro cytotoxic activity of *Salsola oppositifolia* Desf. (Amaranthaceae) in a panel of tumour cell lines. *Z. Naturforsch. C.* **2008**, *63*, 347-354.
19. Xiang, Y.; Li, Y.-B.; Zhang, J.; Li, P.; Yao, Y.-Z. Studies on chemical constituents of *Salsola collina*. *China journal of Chinese materia medica* **2007**, *32*, 409-413.
20. Syrchina, A.; Gorshkov, A.; Shcherbakov, V.; Zinchenko, S.; Vereshchagin, A.; Zaikov, K.; Semenov, A. Flavonolignans of *Salsola collina*. *Chem. Nat. Compd.* **1992**, *28*, 155-158.
21. Ahmad, S.; Maharvi, G.; Ashraf, M.; Riaz, N.; Afza, N.; Khan, K.; Khan, M.; Jabbar, A.; Janbaz, K. Phytochemical studies on *Salsola baryosma*. *J. Chem. Soc. Pak.* **2006**, *28*, 176-178.
22. Woldu, Y.; Abegaz, B. Isoflavonoids from *Salsola somalensis*. *Phytochemistry* **1990**, *29*, 2013-2015.
23. Abegaz, B.M.; Woldu, Y. Isoflavonoids from the roots of *Salsola somalensis*. *Phytochemistry* **1991**, *30*, 1281-1284.
24. Saleem, M.; Akhter, N.; Shaiq Ali, M.; Nazir, M.; Riaz, N.; Moazzam, M.; Arshad, M.; Jabbar, A. Structure determination of salisomide and salisoflavan, two new secondary metabolites from *Salsola imbricata*, by 1D and 2D NMR spectroscopy. *Magn. Reson. Chem.* **2009**, *47*, 263-265.
25. Beyaoui, A.; Chaari, A.; Ghouila, H.; Ali Hamza, M.h.; Ben Jannet, H. New antioxidant bibenzyl derivative and isoflavonoid from the Tunisian *Salsola tetrandra* Folsk. *Nat. Prod. Res.* **2012**, *26*, 235-242.

26. Cho, H.K.; Suh, W.S.; Kim, K.H.; Kim, S.Y.; Lee, K.R. Phytochemical constituents of *Salsola komarovii* and their effects on NGF induction. *Nat. Prod. Sci.* **2014**, *20*, 95-101.
27. Oueslati, M.H.; Al-Ghamdi, F.A.; Noubigh, A. Two new bioactive salsolanol and biphenylsalsinol from the aerial parts of *Salsola villosa* Delile. ex Schul.(Chenopodiaceae) growing in Saudi Arabia. *Asian Pac. J. Trop. Biomed.* **2015**, *5*, 624-628.
28. Oueslati, M.H.; Bouajila, J.; Jannet, H.B. Two New Bioactive Biphenylpropanoids from the Roots of *Salsola imbricata* (Chenopodiaceae) Growing in Saudi Arabia. *Orient. J. Chem.* **2017**, *33*, 1871-1878.
29. Ahmad, S.; Ashraf, M.; Riaz, N.; Choudhary, M.I.; Maharvi, G.M.; Afza, N.; Jabbar, A.; Janbaz, K.H.; Khan, M.S. Salsolide, a new p-hydroxyphenylglycol derivative from *Salsola baryosma*. *Journal of The Chemical Society of Pakistan* **2008**, *30*, 110-112.
30. Oueslati, M.H.; Ben Jannet, H.; Mighri, Z.; Chriaa, J.; Abreu, P.M. Phytochemical constituents from *Salsola tetrandra*. *J. Nat. Prod.* **2006**, *69*, 1366-1369.
31. Sokolowska-Krzaczek, A.; Skalicka-Wozniak, K.; Czubkowska, K. Variation of phenolic acids from herb and roots of *Salsola kali* L. *Acta Soc. Bot. Pol.* **2009**, *78*, 197-201.
32. Zhao, X.-L.; Yuan, W.; Li, Z.-Z.; Jin, H.; Gong, Y.-L. *Salsola collina* ethyl acetate extract alleviates diabetic gastroparesis possibly through oxidative stress inhibition. In Proceedings of IOP Conference Series: Earth and Environmental Science; p. 012021.
33. Xiang, Y.; Li, Y.-B.; Zhang, J.; Li, P.; Yao, Y.-Z. A new alkaloid from *Salsola collina*. *Acta Pharm. Sin.* **2007**, *42*, 618-620.
34. Khan, K.M.; Maharvi, G.M.; Abbaskhan, A.; Hayat, S.; Khan, M.T.H.; Makhmoor, T.; Choudhary, M.I.; Shaheen, F. Three tyrosinase inhibitors and antioxidant compounds from *Salsola foetida*. *Helv. Chim. Acta* **2003**, *86*, 457-464.
35. Zhao, Y.; Ding, X. Studies on the alkaloids from *Salsola collina* Pall. *Acta Pharm. Sin.* **2004**, *39*, 598-600.
36. Glushchenko, A.; Georgiyants, V.; Bevez, N. Development and Estimation of Validation Characteristics For The Quantitative Determination of Glycoalkaloid in *Salsola collina* L. Extracts. *Acta Chim. Pharm. Indica* **2015**, *5*, 47-54.
37. Loizzo, M.R.; Tundis, R.; Statti, G.A.; Passalacqua, N.G.; Peruzzi, L.; Menichini, F. In vitro angiotensin converting enzyme inhibiting activity of *Salsola oppositifolia* Desf., *Salsola soda* L. and *Salsola tragus* L. *Nat. Prod. Res.* **2007**, *21*, 846-851.
38. Tundis, R.; Menichini, F.; Conforti, F.; Loizzo, M.R.; Bonesi, M.; Statti, G.; Menichini, F. A potential role of alkaloid extracts from *Salsola* species (Chenopodiaceae) in the treatment of Alzheimer's disease. *J. Enzyme Inhib. Med. Chem.* **2009**, *24*, 818-824.
39. Karawya, M.; Wassel, G.; Ruecker, G.; Baghdadi, H.; Ahmed, Z. Isolation of triacetoneamine from *Salsola tetrandra*. *Phytochemistry* **1971**, *10*, 3303-3304.
40. Karawya, M.; Wassel, G.; Baghdadi, H.; Ahmed, Z. Isolation of methyl carbamate from four Egyptian *Salsola* species. *Phytochemistry* **1972**.
41. Elsharabasy, F.S.; AL-Mushhin, A.A.; Araffa, S.; Farrag, A.R.H. Phytochemical screening and gastroprotective effect of the aerial parts of *Salasola terrandra* Forssk. Against aspirin induced gastric ulceration in rats. *J. pharmacogn. phytochem.* **2015**, *3*, 221-232.
42. Hamed, A.I.; Masullo, M.; Sheded, M.G.; Mahalel, U.A.; Tawfik, M.M.; Perrone, A.; Piacente, S. Triterpene saponins from *Salsola imbricata*. *Phytochem. Lett.* **2011**, *4*, 353-356.



43. Annaev, C.; Isamukhamedova, M.; Abubakirov, N. Triterpene glycosides of *Salsola micranthera*. I. Structures of salsolosides C and D. *Chem. Nat. Compd.* **1983**, *19*, 691-695.
44. Annaev, C.; Isamukhamedova, M.; Abubakirov, N. Triterpene glycosides of *Salsola micranthera*. II. The structure of salsoloside E. *Chem. Nat. Compd.* **1984**, *20*, 60-64.
45. Alturkistani, T.; Bin Afif, M.; Alzahrani, R.; Alnouno, R.; Badr, J.M. Phytochemical investigation of *Salsola kali* extract. *RPBS* **2017**, *1*, 70-72.
46. Ahmad, Z.; Mehmood, S.; Fatima, I.; Malik, A.; Ifzal, R.; Afza, N.; Iqbal, L.; Latif, M.; Nizami, T.A. Structural determination of salsolins A and B, new antioxidant polyoxygenated triterpenes from *Salsola baryosma*, by 1D and 2D NMR spectroscopy. *Magn. Reson. Chem.* **2008**, *46*, 94-98.
47. Karawya, M.; Wassel, G.; Baghdadi, H.; Ahmed, Z. Phytochemical study of certain *Salsola* species. *Planta Med.* **1972**, *21*, 173-176.
48. Salt, T.A.; Adler, J.H. Diversity of sterol composition in the family Chenopodiaceae. *Lipids* **1985**, *20*, 594-601.
49. Aniss, H.A.; Said, A.E.M.; El Sayed, I.H.; Adly, C. Amelioration of adriamycin-induced cardiotoxicity by *Salsola kali* aqueous extract is mediated by lowering oxidative stress. *Redox Rep.* **2014**, *19*, 170-178.
50. Gannoun, S.; Mahfoudhi, A.; Flamini, G.; Helal, A.; Mighri, Z. Chemical composition and antimicrobial activities of Tunisian *Salsola vermiculata* L. *J. Chem. Pharm. Res.* **2016**, *8*, 1087-1092.
51. Mohammed, H.A.; Al-Omar, M.S.; Aly, M.S.; Hegazy, M.M. Essential oil constituents and biological activities of the halophytic plants, *Suaeda vermiculata* Forssk and *Salsola cyclophylla* Bakera growing in Saudi Arabia. *J. Essent. Oil Bear. Plants* **2019**, *22*, 82-93.
52. Narantuyaa, S.; Batsuren, D.; Batirov, É.K.; Malikov, V. Chemical study of plants of the Mongolian flora coumarins of *Salsola laricifolia*. *Chem. Nat. Compd.* **1986**, *22*, 228-229.
